# Supplementary material
Source: ML conference proceedings conference paper supplement (https://openaccess.thecvf.com/content/CVPR2023/html/Kweon_Weakly_Supervised_Semantic_CVPR_2023_paper.html)
Supplement: Supplementary file 1 [file Kweon_Weakly_Supervised_Semantic_CVPR_2023_supplemental.pdf]

# Weakly Supervised Semantic Segmentation via Adversarial Learning of Classifier and Reconstructor: *Supplementary Material*

Anonymous CVPR submission

Paper ID 5400

## A. Implementation Details

### A.1. Network Architecture

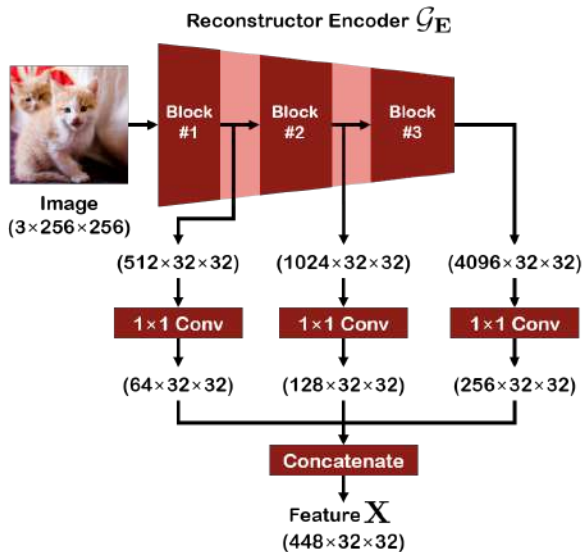

Figure A1. Visualization of the Reconstructor Encoder. We aggregate the feature maps from multiple different layers into a multi-scale feature map  $\mathbf{X}$ .

The proposed framework has two networks: a classifier  $\mathcal{F}$  and a reconstructor  $\mathcal{G}$ . We employ the ResNet38 [8] as the backbone for the classifier, as in many other WSSS studies [2, 3, 5–7, 10, 11]. We add a  $1 \times 1$  convolution layer to the backbone, as a classification head for acquiring CAMs.

We visualize the architecture of the reconstructor encoder  $\mathcal{G}_E$  in Fig. A1. Similar to the classifier, we employ ResNet38 as a backbone for the encoder. Here, for better reconstruction capability, we aggregate the feature maps from multiple different layers into a multi-scale feature map. We add  $1 \times 1$  convolution layers for integrating the feature maps. The feature  $\mathbf{X}$  in the main paper denotes this multi-scale feature map, where the dimension  $d$  is set to 448. This design enables the encoder to extract both primitive details from low-level and context information from high-level.

Table A1. Dimensions of the output feature obtained by each block of our reconstructor decoder. For example, the output of the D1 block has a dimension of  $64 \times 128 \times 128$ . Note that the final output (of C block) is a reconstructed RGB image, and thereby has  $3 \times 256 \times 256$  dimension.

| Blocks  | Input | D1  | D2  | D3  | D4  | D5  | D6  | D7  | D8  |
|---------|-------|-----|-----|-----|-----|-----|-----|-----|-----|
| Channel | 448   | 64  | 128 | 256 | 512 | 512 | 512 | 512 | 512 |
| Size    | 256   | 128 | 64  | 32  | 16  | 8   | 4   | 2   | 1   |

  

| Blocks  | - | U7   | U6   | U5   | U4   | U3  | U2  | U1  | C   |
|---------|---|------|------|------|------|-----|-----|-----|-----|
| Channel | - | 1024 | 1024 | 1024 | 1024 | 512 | 256 | 128 | 3   |
| Size    | - | 2    | 4    | 8    | 16   | 32  | 64  | 128 | 256 |

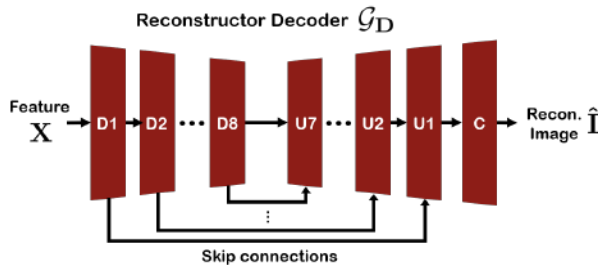

Figure A2. Visualization of the UNet-based Reconstructor Decoder. The decoder gets upscaled feature  $\mathbf{X}$  and returns the reconstructed image  $\hat{\mathbf{I}}$ .  $\mathbf{D}$ ,  $\mathbf{U}$ , and  $\mathbf{C}$  denote the Downsample, Upsample, and Colorization blocks, respectively.

For the reconstructor decoder  $\mathcal{G}_D$ , we devise a UNet-based architecture, as shown in Fig. A2. Note that we up-scale the feature  $\mathbf{X}$  into the size of the input image, before passing it to the decoder. The decoder is composed of eight downsample (D) blocks, seven upsample (U) blocks, and one colorization (C) block. Each downsample block is a  $4 \times 4$  convolutional layer with a stride of 2 followed by a normalization layer and leakyReLU (LReLU) activation. On the other hand, each upsample block has  $4 \times 4$  transposed convolutional layer with a stride of 2. Similar to the downsample block, we also use the normalization layer and LReLU activation. Finally, the colorization block is composed of a  $2 \times$  bilinear upsample followed by a  $1 \times 1$  convolutional layer for obtaining the output having 3 channels (RGB). For reproducibility, we provide the dimensions of the feature obtained by each block in Table A1.

Table A2. Ablation study on probability  $q$ . The mIoU performance on the PASCAL VOC 2012 train set is listed.

| $q$  | 0.60 | 0.65 | 0.70 | 0.75 | 0.80 | 0.85 | 0.90 |
|------|------|------|------|------|------|------|------|
| mIoU | 59.7 | 59.6 | 59.6 | 60.1 | 60.3 | 60.3 | 60.0 |

## A.2. Details on Stochastic Remnant Feeding (SRF)

As described in Section 4.2.2 of the main paper, we devise a Stochastic Remnant Feeding (SRF) technique. It aims to prevent the over-fitting of the reconstruction network, by feeding the synthetic remnants obtained by a stochastic grid. The stochastic grid is a random binary grid  $\mathbf{g} \in [0, 1]^{h \times w}$  composed of  $s \times s$  cells. Each  $\frac{h}{s} \times \frac{w}{s}$  size cell has a value of 0 or 1, sampled from the Bernoulli distribution, which is independent and identical, having the probability of  $q$ .

For the number of cells  $s$ , we use an integer sampled from the uniform distribution in the range of 16 to 24, as  $s \sim U_{[16,24]}$ . The sampling is performed in every iteration. We have adjusted the range of sampling, however, no meaningful increase in performance is observed.

For the probability of the Bernoulli distribution, we set the initial value of  $q$  as 0.8. Note that it means that 80% of the grid has a value of 1, and the other 20% has 0. At the early stage of learning, the reconstructor is not very specialized in using the remnants for inferring one segment from the other. Therefore, we initially set  $q$  as a value high enough, which can be interpreted as giving an easy problem for the reconstructor to solve. Then, we decrease the probability as training proceeds (1% per epoch). Similar to curriculum learning, the reconstructor is trained to solve a more difficult problem as training proceeds and to better exploit the remnants for reconstructing one segment from the other segment, as we intended. We experimentally verified that using this strategy provides around 1% gain. We also provide the mIoU performance achieved by using the various different initial values for  $q$ , as in Table. A2. The results support the robustness of the proposed SRF strategy against the change of the probability  $q$ .

## A.3. Settings for MS COCO dataset

**Training CAMs** Our framework is trained on MS COCO dataset for 3 epochs, which took a day with a single RTX 3090 ti. The weighting parameters  $\lambda_t^{RU}$  and  $\lambda_{nt}^{RU}$  are equally set to 0.2. For the  $\lambda_t^{CU}$  and  $\lambda_{nt}^{CU}$ , we set the values to 0.3 and 0.2, respectively. The learning rate and batch size for COCO are set to 0.005 and 8, respectively.

**Training Semantic Segmentation** For the training of the semantic segmentation model, we used a smaller learning rate ( $5 \times 10^{-4}$ ) than in training the CAMs. We trained the model with 30 epochs using the obtained pseudo-labels of 81k *train* set. The weight decay and batch size are set to  $5 \times 10^{-5}$  and 8, respectively.

## B. Incorporating with Transformer

Recently, due to its remarkable representation capability, Vision Transformer (ViT) [4] is widely used in various computer vision tasks, including WSSS. For a fair comparison with the ViT-based method [9], we further incorporate the proposed method with the ViT.

Our original implementation is based on the conventional convolutional neural network (CNN). However, the proposed philosophy (*i.e.*, adversarial learning of classifier and reconstructor) does not have an explicit limitation on its choice of backbones. As in MCTformerV2 [9], we refine the CAM obtained by the proposed method, using attention between the patch tokens. Note that we use the same reconstructor with our CNN-based implementation. We provide the quantitative evaluation of this incorporated version, denoted as Ours (+ViT), in the main paper. This setting still outperforms its baseline (MCTformerV2 [9]) even when using the ViT backbone, supporting the superiority of the proposed method. We show some CAMs (Fig. A3) and semantic segmentation results (Fig. A4) of Ours (+ViT), comparing with those of the MCTformerV2.

## C. Results on PASCAL VOC

**CAMs** In Fig. A5, we show the CAMs obtained by our framework, which were omitted from the main paper due to page limit. The image samples are from PASCAL VOC 2012 *train* set. As we can refer from Fig. A5, the CAMs from our proposed method are not only precise but also more evenly distributed.

**Reconstructed Images** In Fig. A6, we provide some samples of the reconstructed images obtained by our framework, in addition to the target/non-target CAMs and binary grid for SRF. In detail, we visualize the reconstructed images from RU phase ( $\hat{\mathbf{I}}_t^{RU}$ ,  $\hat{\mathbf{I}}_{nt}^{RU}$ ) and CU phase ( $\hat{\mathbf{I}}_t^{CU}$ ,  $\hat{\mathbf{I}}_{nt}^{CU}$ ). As we can observe  $\hat{\mathbf{I}}_t^{RU}$ , in RU phase, the reconstructor could reconstruct the non-target regions with the help of the remnants, and so on for  $\hat{\mathbf{I}}_{nt}^{RU}$ . On the other hand, in CU phase, we can observe that the reconstructor failed to reconstruct the original image corresponding to the non-target regions as shown in  $\hat{\mathbf{I}}_t^{CU}$ . Similarly,  $\hat{\mathbf{I}}_{nt}^{CU}$  shows that the reconstructor failed to reconstruct the target region. The results imply that the classifier and the reconstructor in our framework play their role as we intended.

**Semantic Segmentation** By applying IRN [1] to CAMs as previous WSSS methods, we acquired high-quality pseudo-labels with SoTA performance. After training the semantic segmentation with the pseudo-labels, we also achieve a new SOTA in semantic segmentation stage with only image-level supervision. Semantic segmentation results on PASCAL VOC 2012 *val* set are shown in Fig. A7. The mIoU performance on *test* set is shown here <sup>1</sup>.

<sup>1</sup><http://host.robots.ox.ac.uk:8080/anonymou/ZQKP1X.html>

## D. Results on MS COCO

**CAMs** To show the superiority of the proposed method, we also conduct experiments on MS COCO dataset. Since the MS COCO dataset contains more classes and smaller objects than PASCAL VOC, it is more difficult to get precise CAMs/pseudo-labels. However, as shown in Fig A8, CAMs from the proposed method are not only precise but also capture small details (see the last row of Fig. A8, *backpack*) well. Also, as shown in the 4-6<sup>th</sup> row of Fig. A8, the CAMs are mutually exclusive while having accurate boundaries.

**Semantic Segmentation** As in PASCAL VOC, we obtained pseudo-labels by applying IRN [1] to CAMs. The mIoU of the pseudo-labels is 48.1% on 81k *train* set. The semantic segmentation model trained with the pseudo-labels achieves a new SoTA with 45.3% mIoU on 40k *val* set. Semantic segmentation results are also shown in Fig. A9.

## References

- [1] Jiwoon Ahn, Sunghyun Cho, and Suha Kwak. Weakly supervised learning of instance segmentation with inter-pixel relations. In *Proceedings of the IEEE Conference on Computer Vision and Pattern Recognition*, pages 2209–2218, 2019. 2, 3
- [2] Jiwoon Ahn and Suha Kwak. Learning pixel-level semantic affinity with image-level supervision for weakly supervised semantic segmentation. In *Proceedings of the IEEE Conference on Computer Vision and Pattern Recognition*, pages 4981–4990, 2018. 1
- [3] Yu-Ting Chang, Qiaosong Wang, Wei-Chih Hung, Robinson Piramuthu, Yi-Hsuan Tsai, and Ming-Hsuan Yang. Weakly-supervised semantic segmentation via sub-category exploration. In *Proceedings of the IEEE/CVF Conference on Computer Vision and Pattern Recognition*, pages 8991–9000, 2020. 1
- [4] Alexey Dosovitskiy, Lucas Beyer, Alexander Kolesnikov, Dirk Weissenborn, Xiaohua Zhai, Thomas Unterthiner, Mostafa Dehghani, Matthias Minderer, Georg Heigold, Sylvain Gelly, et al. An image is worth 16x16 words: Transformers for image recognition at scale. *arXiv preprint arXiv:2010.11929*, 2020. 2
- [5] Hyeokjun Kweon, Sung-Hoon Yoon, Hyeonseong Kim, Dahee Park, and Kuk-Jin Yoon. Unlocking the potential of ordinary classifier: Class-specific adversarial erasing framework for weakly supervised semantic segmentation. In *Proceedings of the IEEE/CVF International Conference on Computer Vision*, pages 6994–7003, 2021. 1
- [6] Wataru Shimoda and Keiji Yanai. Self-supervised difference detection for weakly-supervised semantic segmentation. In *Proceedings of the IEEE International Conference on Computer Vision*, pages 5208–5217, 2019. 1
- [7] Yude Wang, Jie Zhang, Meina Kan, Shiguang Shan, and Xilin Chen. Self-supervised equivariant attention mechanism for weakly supervised semantic segmentation. In *Proceedings of the IEEE/CVF Conference on Computer Vision and Pattern Recognition*, pages 12275–12284, 2020. 1

- [8] Zifeng Wu, Chunhua Shen, and Anton Van Den Hengel. Wider or deeper: Revisiting the resnet model for visual recognition. *Pattern Recognition*, 90:119–133, 2019. 1
- [9] Lian Xu, Wanli Ouyang, Mohammed Bennamoun, Farid Boussaid, and Dan Xu. Multi-class token transformer for weakly supervised semantic segmentation. In *Proceedings of the IEEE/CVF Conference on Computer Vision and Pattern Recognition*, pages 4310–4319, 2022. 2, 4, 5
- [10] Sung-Hoon Yoon, Hyeokjun Kweon, Jegyeong Cho, Shinjeong Kim, and Kuk-Jin Yoon. Adversarial erasing framework via triplet with gated pyramid pooling layer for weakly supervised semantic segmentation. In *Computer Vision—ECCV 2022: 17th European Conference, Tel Aviv, Israel, October 23–27, 2022, Proceedings, Part XXIX*, pages 326–344. Springer Nature Switzerland Cham, 2022. 1
- [11] Bingfeng Zhang, Jimin Xiao, Yunchao Wei, Mingjie Sun, and Kaizhu Huang. Reliability does matter: An end-to-end weakly supervised semantic segmentation approach. In *Proceedings of the AAAI Conference on Artificial Intelligence*, volume 34, pages 12765–12772, 2020. 1

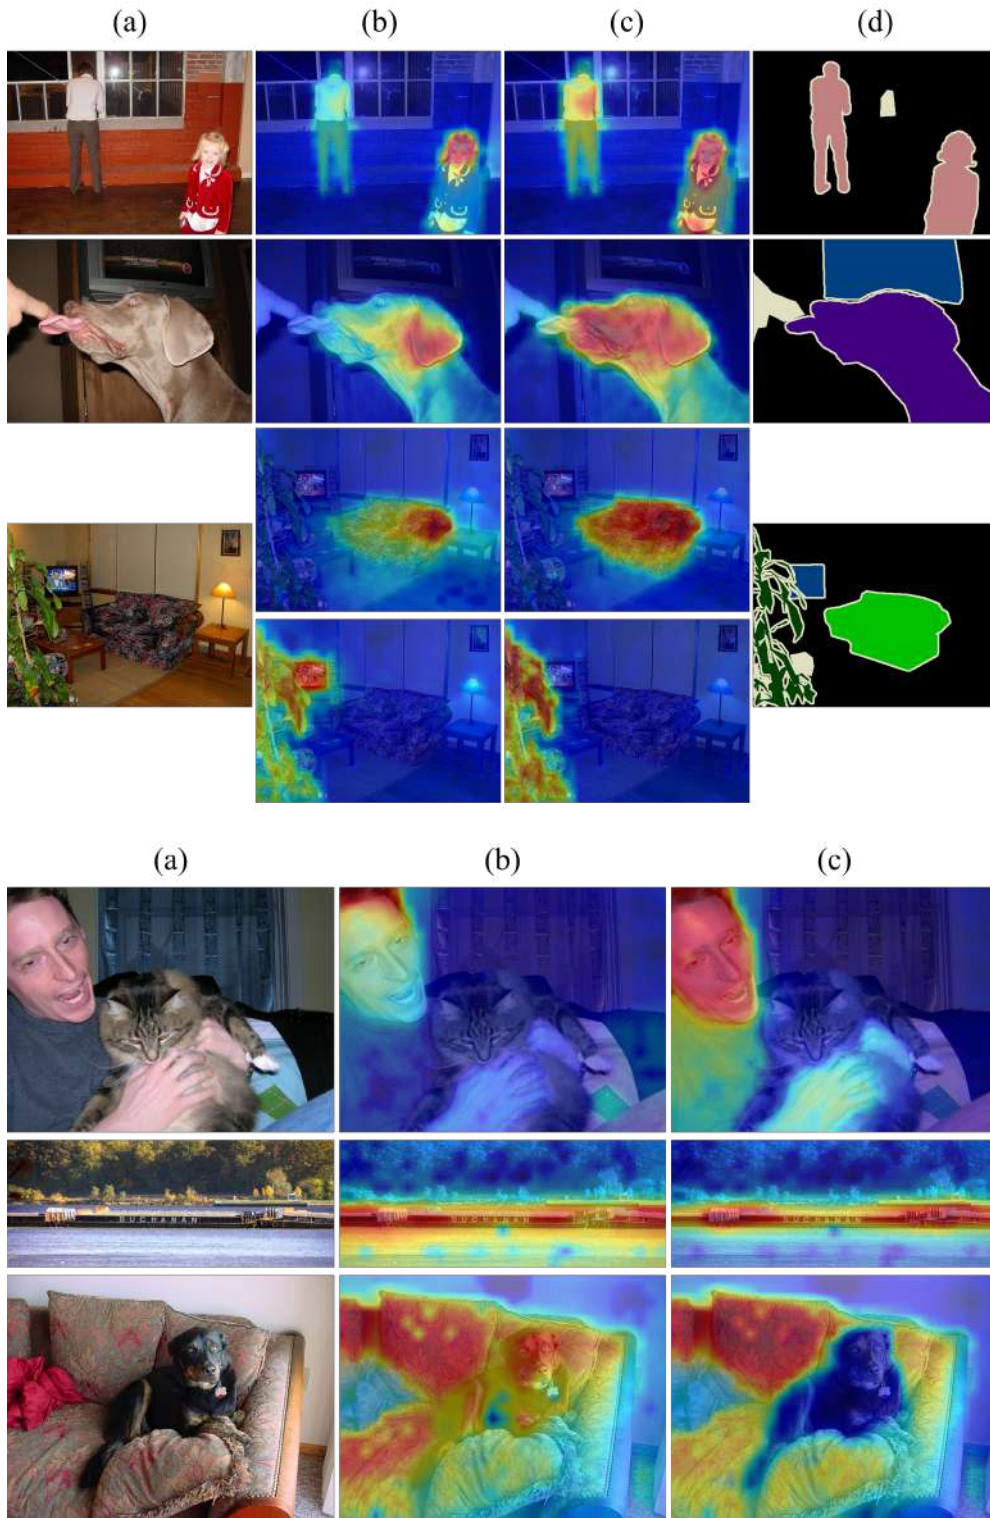

Figure A3. CAMs results on PASCAL VOC 2012 *train* and *trainaug* set. From (a) to (d): images, CAMs of MCTformerV2 [9], Our(+ViT) CAMs, and GTs (if exist). Note that the CAMs of the last row correspond to the *sofa* class.

432  
433  
434  
435  
436  
437  
438  
439  
440  
441  
442  
443  
444  
445  
446  
447  
448  
449  
450  
451  
452  
453  
454  
455  
456  
457  
458  
459  
460  
461  
462  
463  
464  
465  
466  
467  
468  
469  
470  
471  
472  
473  
474  
475  
476  
477  
478  
479  
480  
481  
482  
483  
484  
485

486  
487  
488  
489  
490  
491  
492  
493  
494  
495  
496  
497  
498  
499  
500  
501  
502  
503  
504  
505  
506  
507  
508  
509  
510  
511  
512  
513  
514  
515  
516  
517  
518  
519  
520  
521  
522  
523  
524  
525  
526  
527  
528  
529  
530  
531  
532  
533  
534  
535  
536  
537  
538  
539

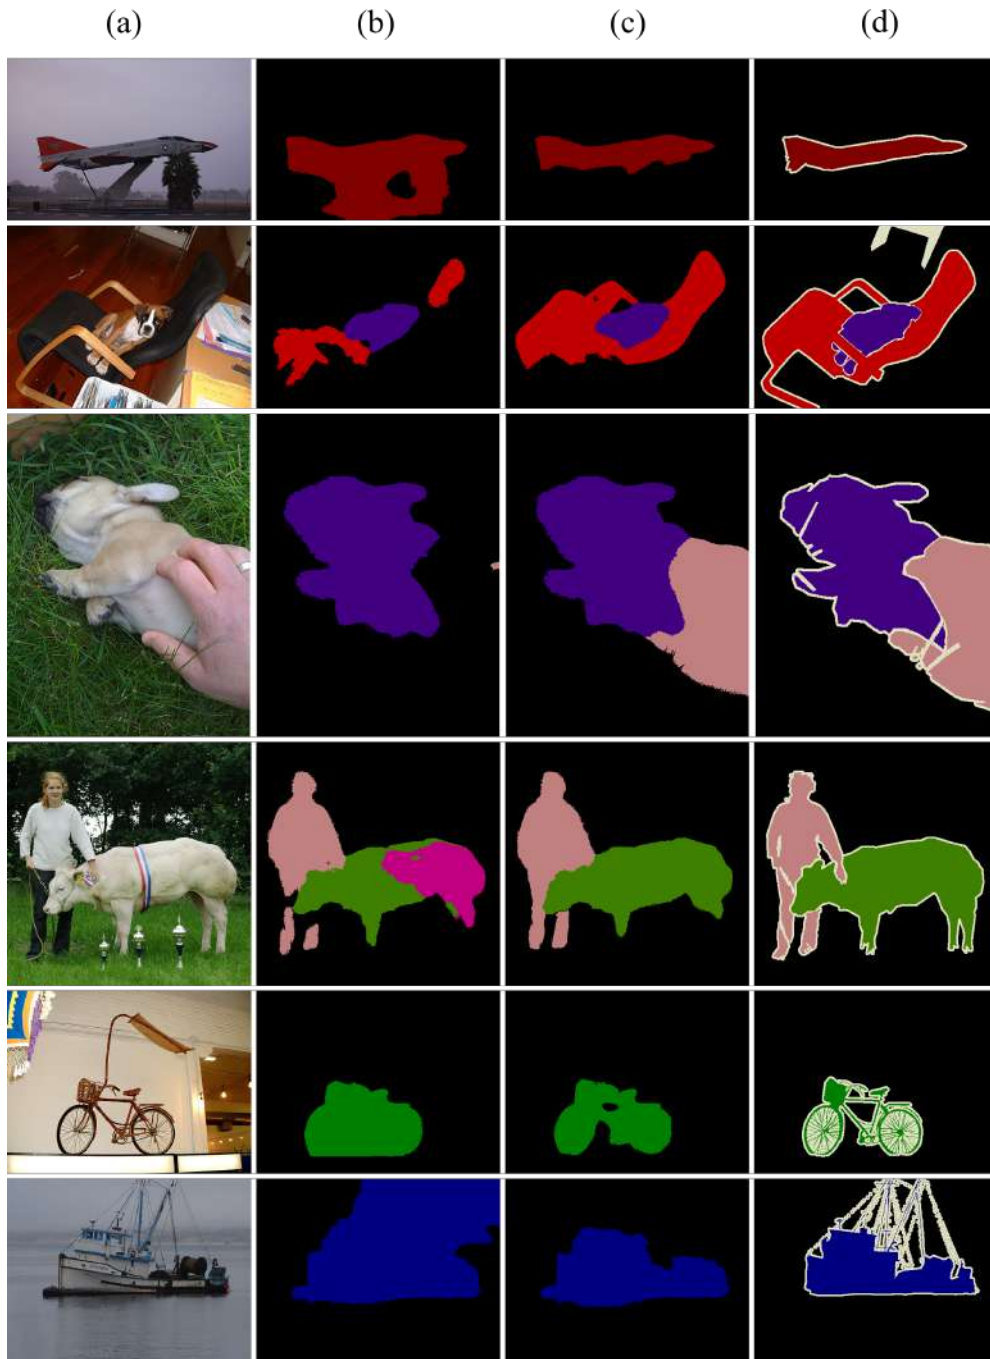

Figure A4. Semantic segmentation results on PASCAL VOC 2012 *train* set. From (a) to (d): images, results of MCTformerV2 [9], results of Our(+ViT), and GTs.

540  
541  
542  
543  
544  
545  
546  
547  
548  
549  
550  
551  
552  
553  
554  
555  
556  
557  
558  
559  
560  
561  
562  
563  
564  
565  
566  
567  
568  
569  
570  
571  
572  
573  
574  
575  
576  
577  
578  
579  
580  
581  
582  
583  
584  
585  
586  
587  
588  
589  
590  
591  
592  
593

594  
595  
596  
597  
598  
599  
600  
601  
602  
603  
604  
605  
606  
607  
608  
609  
610  
611  
612  
613  
614  
615  
616  
617  
618  
619  
620  
621  
622  
623  
624  
625  
626  
627  
628  
629  
630  
631  
632  
633  
634  
635  
636  
637  
638  
639  
640  
641  
642  
643  
644  
645  
646  
647

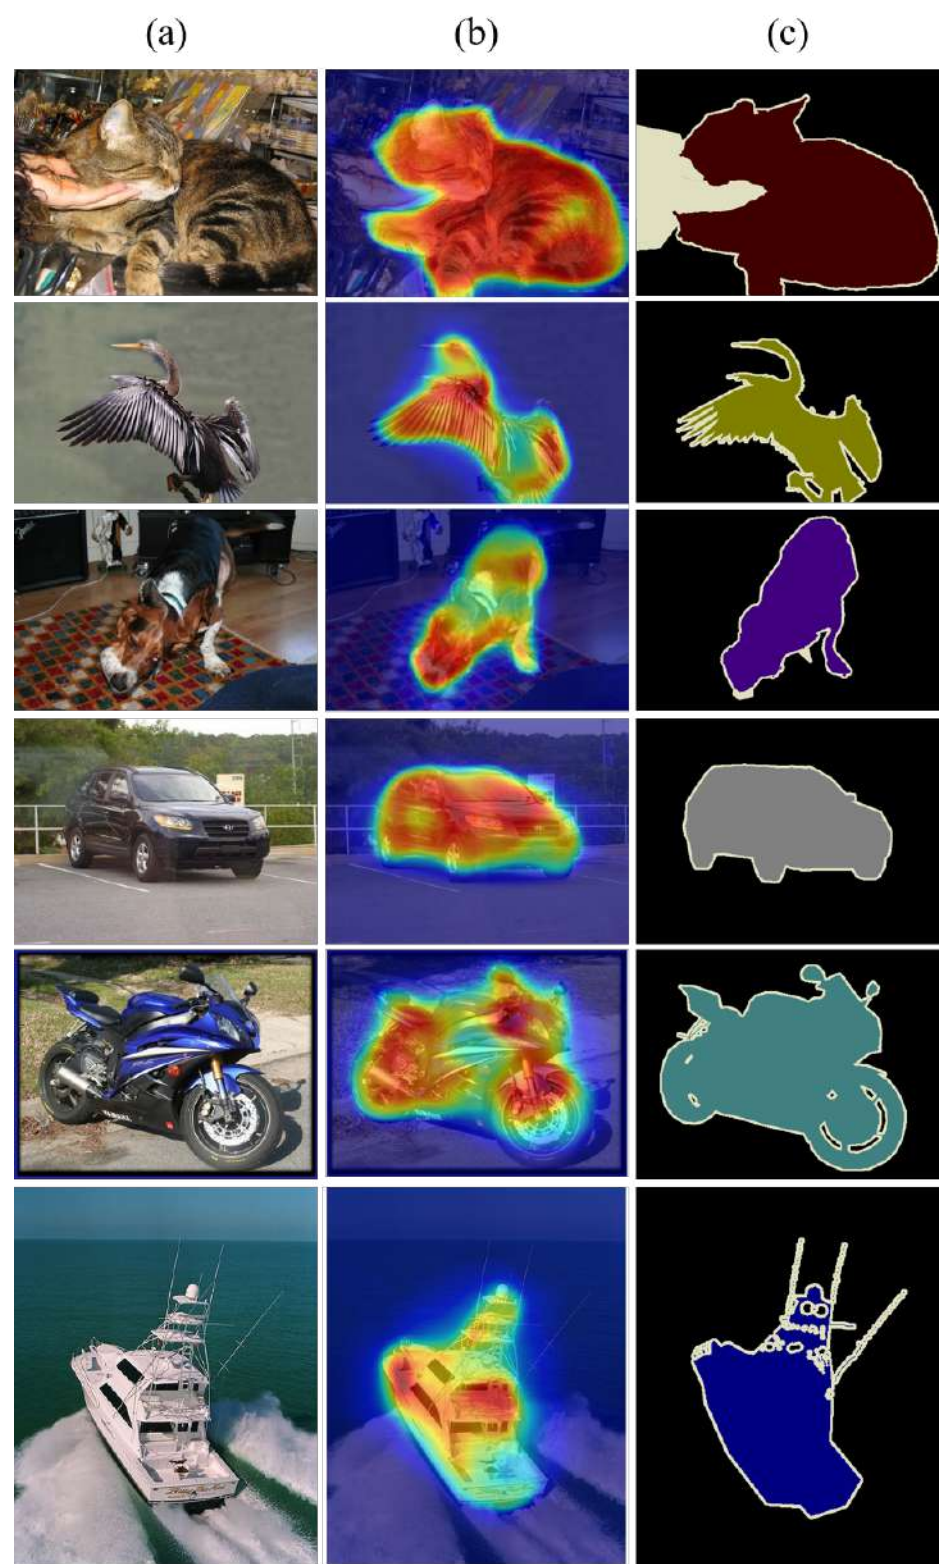

Figure A5. CAMs results on PASCAL VOC 2012 *train* set. From (a) to (c): images, our CAMs, and Ground-Truths (GTs).

|              |                   |                              |                              |
|--------------|-------------------|------------------------------|------------------------------|
| $\mathbf{I}$ | $\mathbf{A}_t$    | $\hat{\mathbf{I}}_t^{RU}$    | $\hat{\mathbf{I}}_t^{CU}$    |
| $g$          | $\mathbf{A}_{nt}$ | $\hat{\mathbf{I}}_{nt}^{RU}$ | $\hat{\mathbf{I}}_{nt}^{CU}$ |

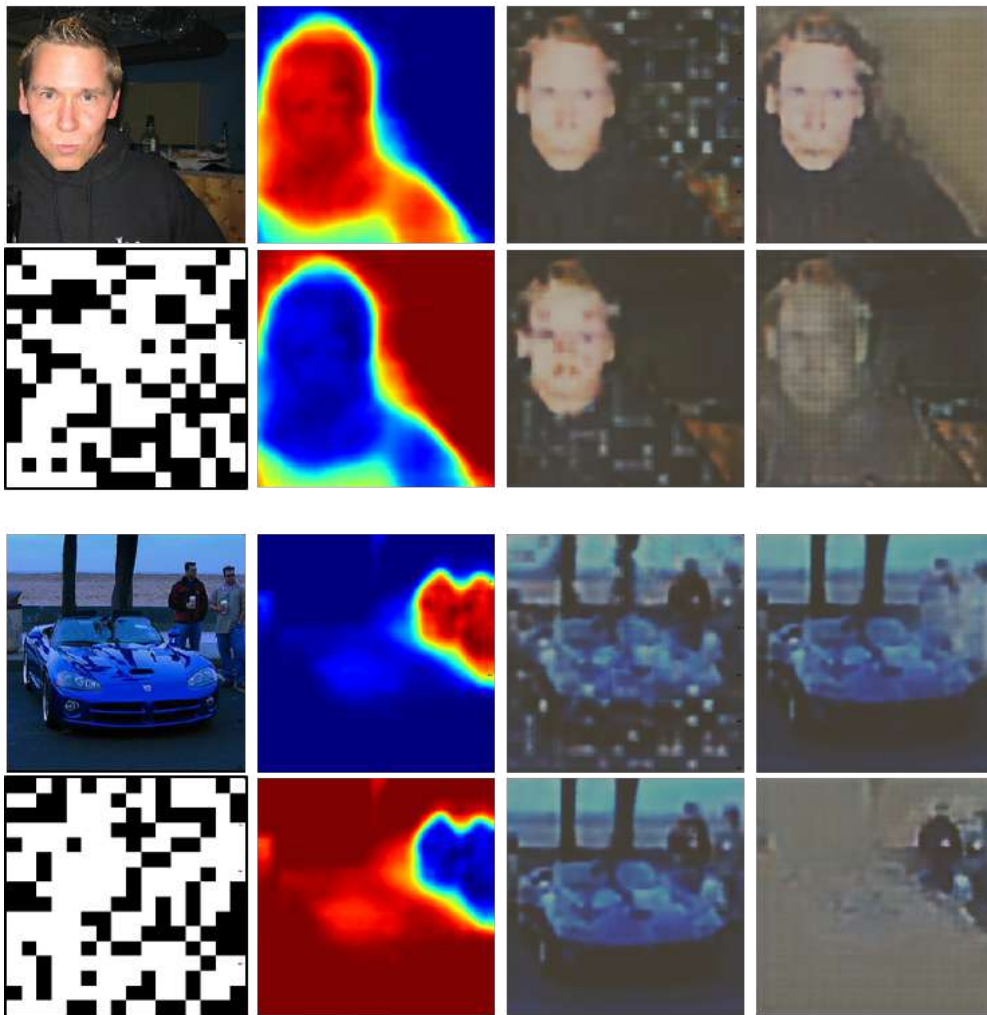

Figure A6. Samples of reconstructed results on PASCAL VOC 2012 *train* set. First row, from left to right: input image ( $\mathbf{I}$ ), target CAM ( $\mathbf{A}_t$ ), image reconstructed from target feature in RU phase ( $\hat{\mathbf{I}}_t^{RU}$ ), and image reconstructed from target CAM in CU phase ( $\hat{\mathbf{I}}_t^{CU}$ ). Second row, from left to right: binary grid ( $g$ ) used for SRF, non-target CAM ( $\mathbf{A}_{nt}$ ), image reconstructed from non-target feature in RU phase ( $\hat{\mathbf{I}}_{nt}^{RU}$ ), and image reconstructed from non-target CAM in CU phase ( $\hat{\mathbf{I}}_{nt}^{CU}$ ).

756  
757  
758  
759  
760  
761  
762  
763  
764  
765  
766  
767  
768  
769  
770  
771  
772  
773  
774  
775  
776  
777  
778  
779  
780  
781  
782  
783  
784  
785  
786  
787  
788  
789  
790  
791  
792  
793  
794  
795  
796  
797  
798  
799  
800  
801  
802  
803  
804  
805  
806  
807  
808  
809

810  
811  
812  
813  
814  
815  
816  
817  
818  
819  
820  
821  
822  
823  
824  
825  
826  
827  
828  
829  
830  
831  
832  
833  
834  
835  
836  
837  
838  
839  
840  
841  
842  
843  
844  
845  
846  
847  
848  
849  
850  
851  
852  
853  
854  
855  
856  
857  
858  
859  
860  
861  
862  
863

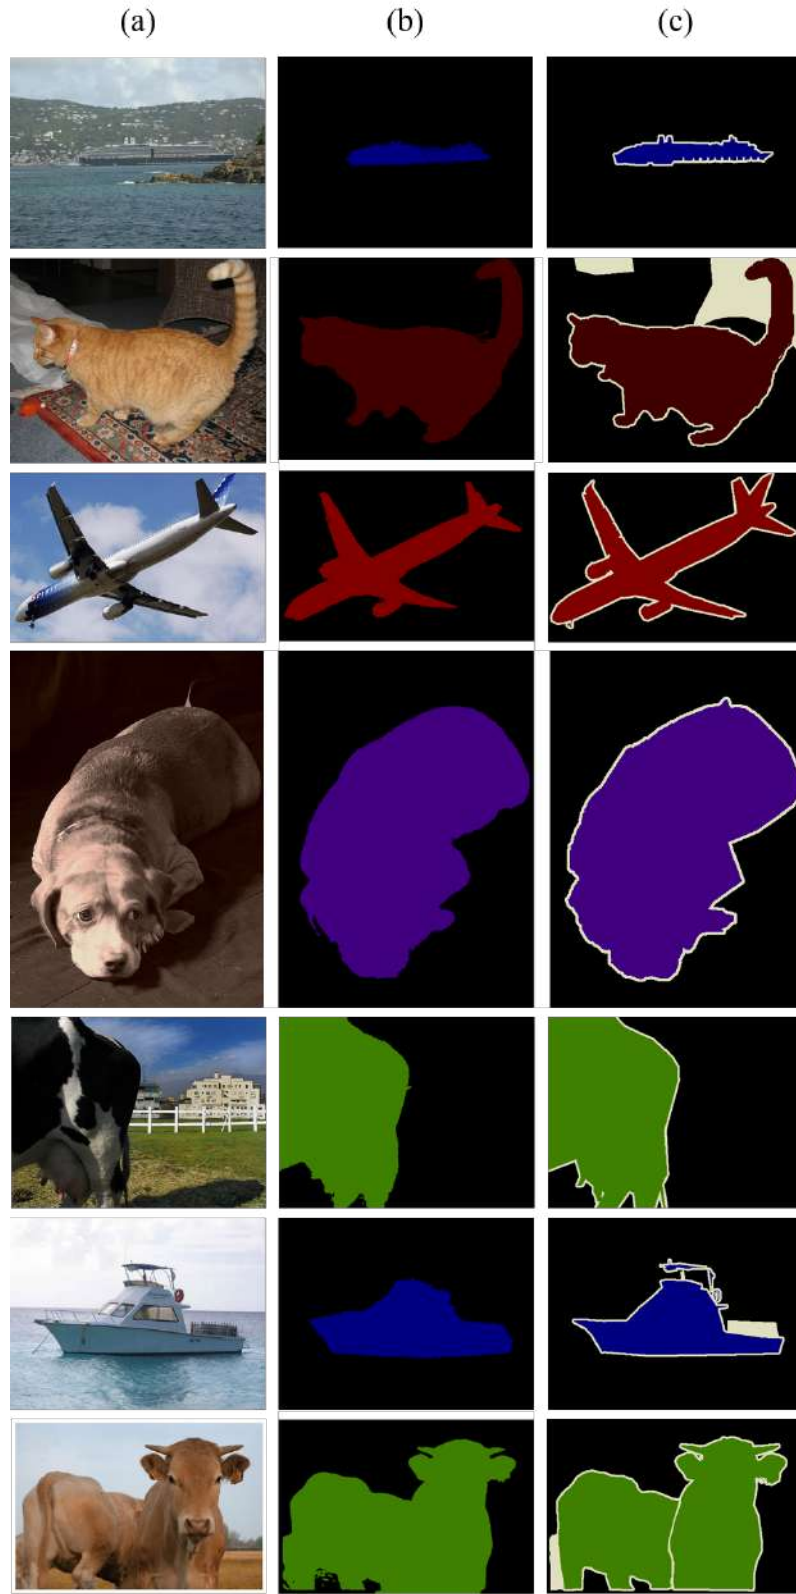

Figure A7. Semantic segmentation results on PASCAL VOC 2012 validation set. From (a) to (c): images, our Deeplab, GTs.



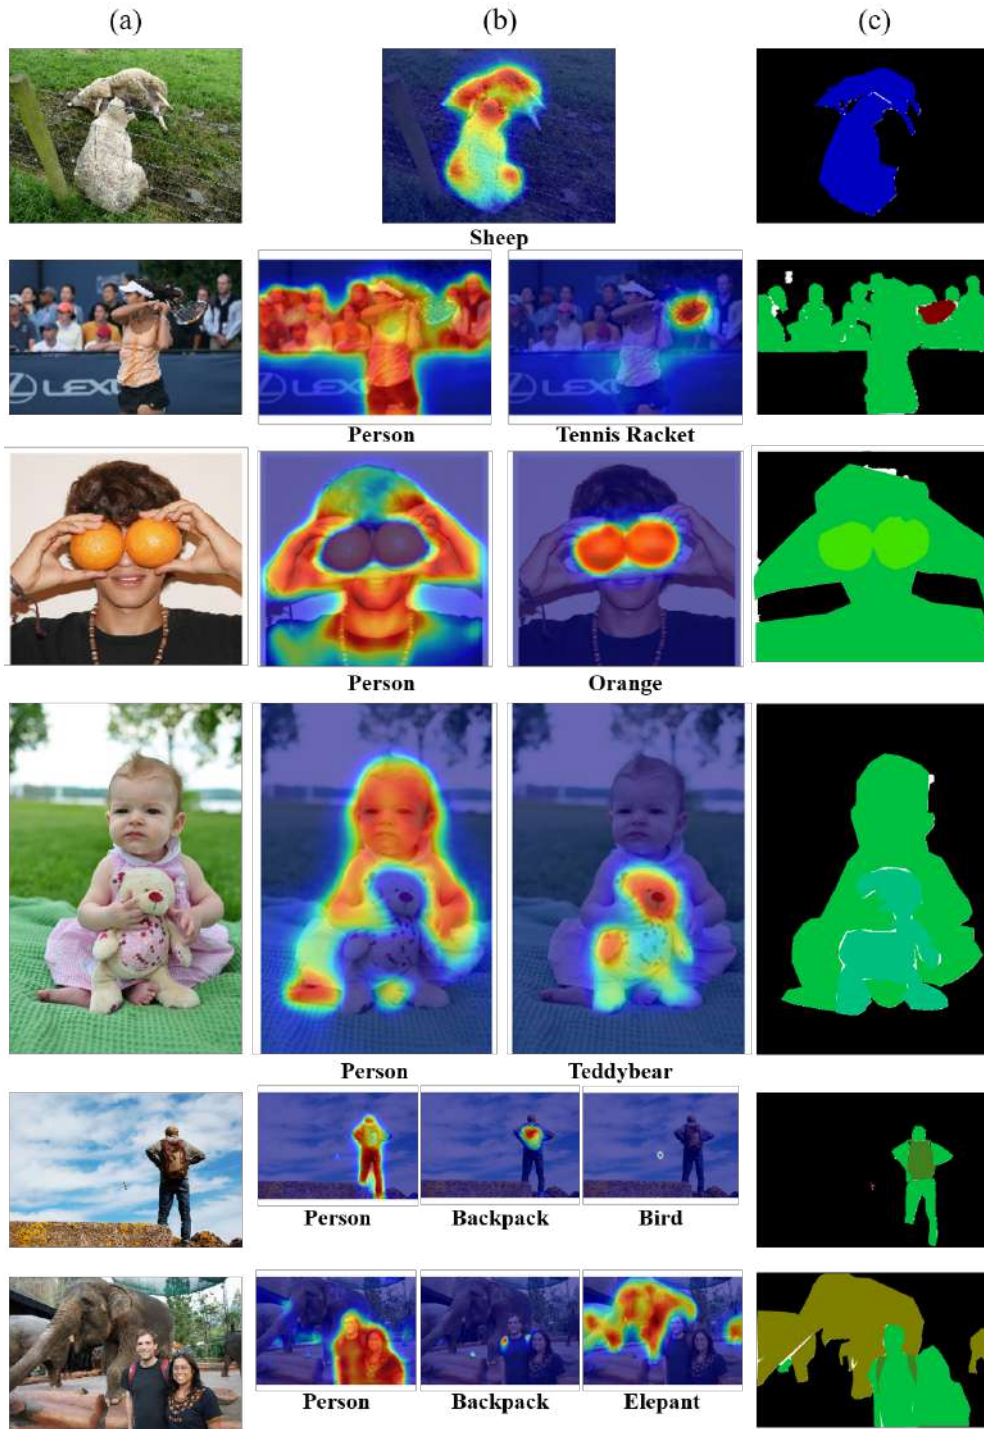

Figure A8. CAMs results on MS COCO train set. From (a) to (c): images, our CAMs, and Ground-Truths (GTs).

972  
973  
974  
975  
976  
977  
978  
979  
980  
981  
982  
983  
984  
985  
986  
987  
988  
989  
990  
991  
992  
993  
994  
995  
996  
997  
998  
999  
1000  
1001  
1002  
1003  
1004  
1005  
1006  
1007  
1008  
1009  
1010  
1011  
1012  
1013  
1014  
1015  
1016  
1017  
1018  
1019  
1020  
1021  
1022  
1023  
1024  
1025

1026  
1027  
1028  
1029  
1030  
1031  
1032  
1033  
1034  
1035  
1036  
1037  
1038  
1039  
1040  
1041  
1042  
1043  
1044  
1045  
1046  
1047  
1048  
1049  
1050  
1051  
1052  
1053  
1054  
1055  
1056  
1057  
1058  
1059  
1060  
1061  
1062  
1063  
1064  
1065  
1066  
1067  
1068  
1069  
1070  
1071  
1072  
1073  
1074  
1075  
1076  
1077  
1078  
1079

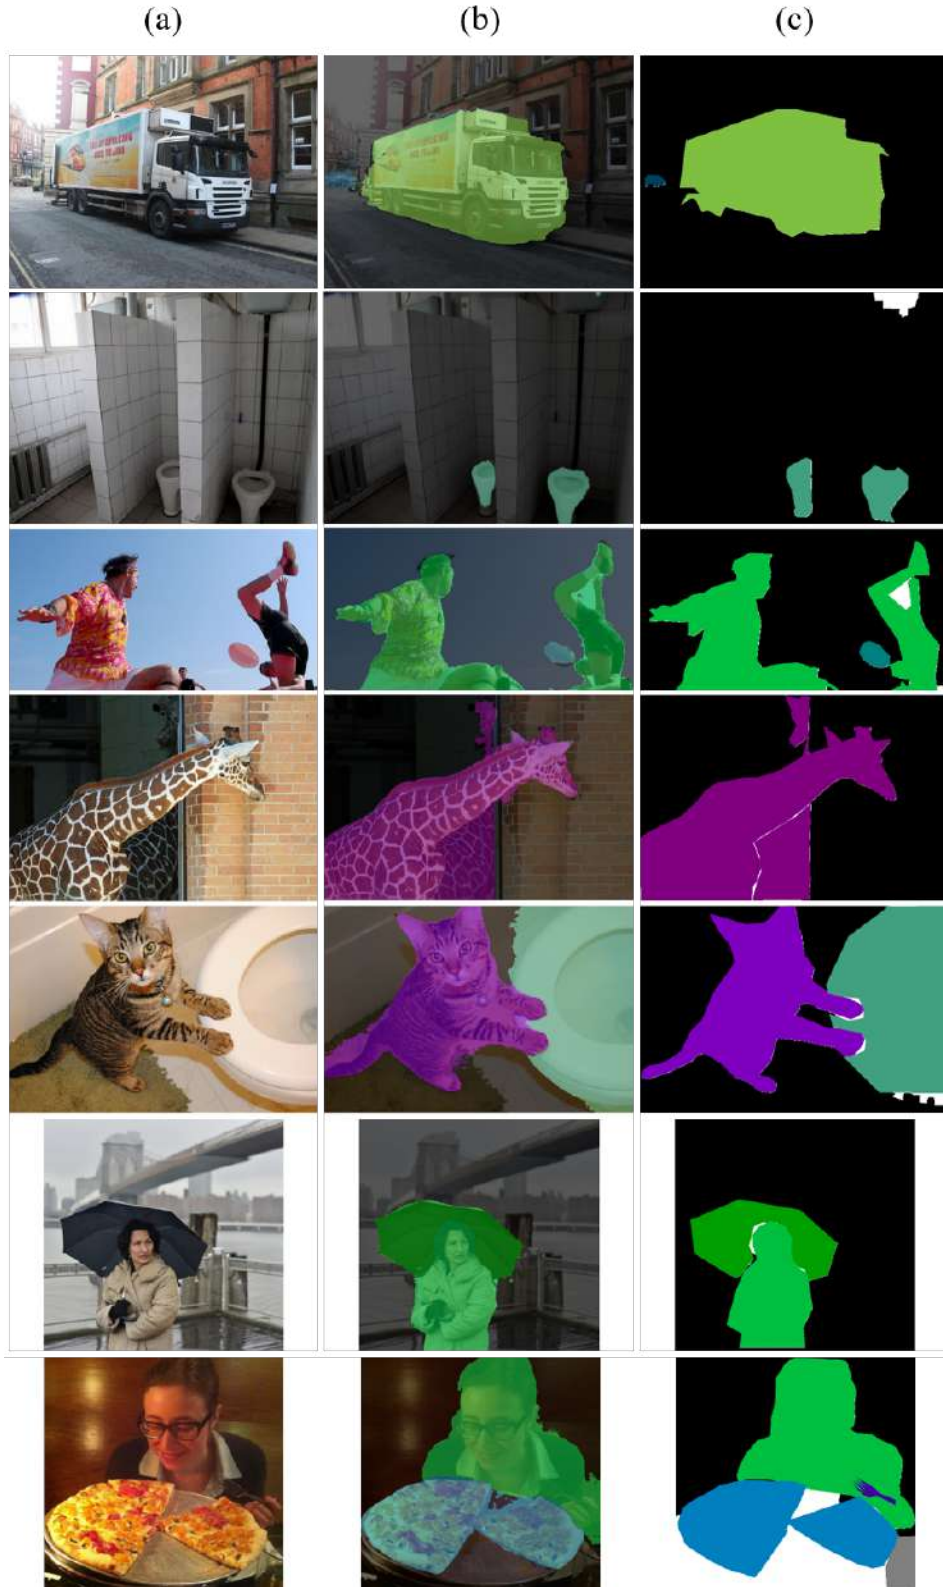

Figure A9. Semantic segmentation results on MS COCO validation set. From (a) to (c): images, our Deeplab, GTs.
